# Supplementary material
Source: Springer Nature journal article supplement (https://www.springermedizin.de/resource/supplementary/12888_2014_1836_MOESM1_ESM.pdf/9481382)
Supplement: MOESM1 [file 9481382]

**Intervention:**

MBT-ED

**Moderators:**

ED diagnosis

PD diagnosis

Age

Sex

Co-morbidities

**Intervention:**

SSCM-ED

**Mediators:**

Object relations (ORI)

Mentalizing (RFQ),  
Reading the mind in the eyes

**1° outcome:**

EDE global score

**2° outcome**

ZAN-BPD

Self harm

Depression/  
anxiety

Social adjustment

Costs of illness and treatment
